# Supplementary material
Source: PubMed Central journal article supplement (PMC9081245)
Supplement: NIHMS1787473-supplement-1.pdf [file NIHMS1787473-supplement-1.pdf]

## Supplementary Figure 1

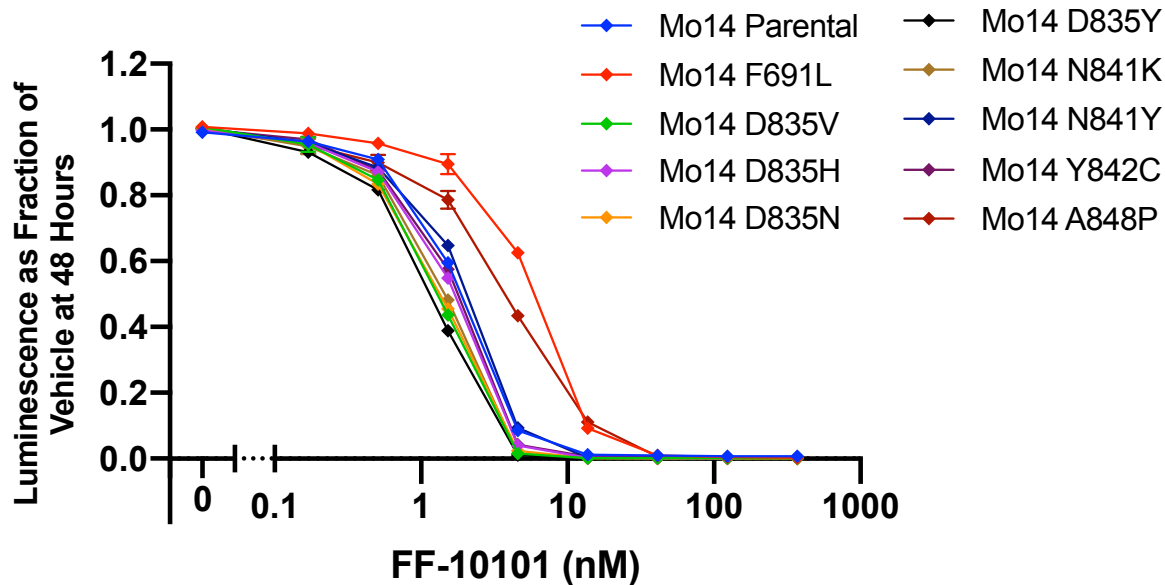

**Supplementary Figure 1. FF-10101 exhibits activity against a subset of clinically described FLT3 TKD mutations that confer resistance to type I and II FLT3 inhibitors.** 48-hour dose response of FF-10101 against MOLM-14 *FLT3*-ITD+ cells harboring indicated secondary TKD mutations. Error bars represent standard deviation of three technical replicates in a single experiment representative of three independent experiments.

## Supplementary Figure 2

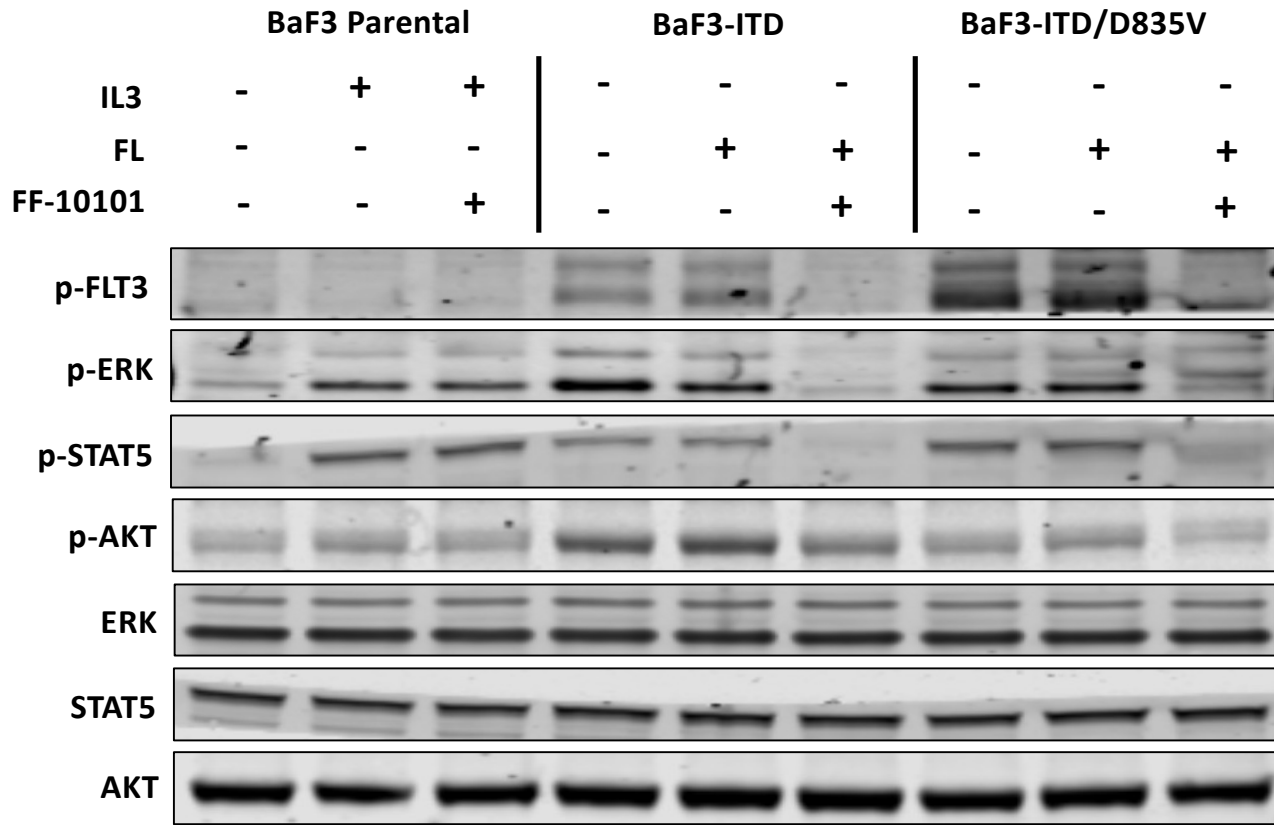

**Supplementary Figure 2. FF-10101 inhibition of ERK signaling occurs predominantly through inhibition of FLT3.** Assessment of FLT3, ERK, STAT5, and AKT phosphorylation by immunoprecipitation and western blot in Ba/F3 parental, Ba/F3-ITD, and Ba/F3-ITD/D835V cells. Cells were suspended in complete RPMI media supplemented with either IL3 (100 ng/mL) or FL (FLT3 Ligand, 10 ng/mL) where indicated and treated with either vehicle or FF-10101 (100 nM) for 1 hour.

## Supplementary Figure 3

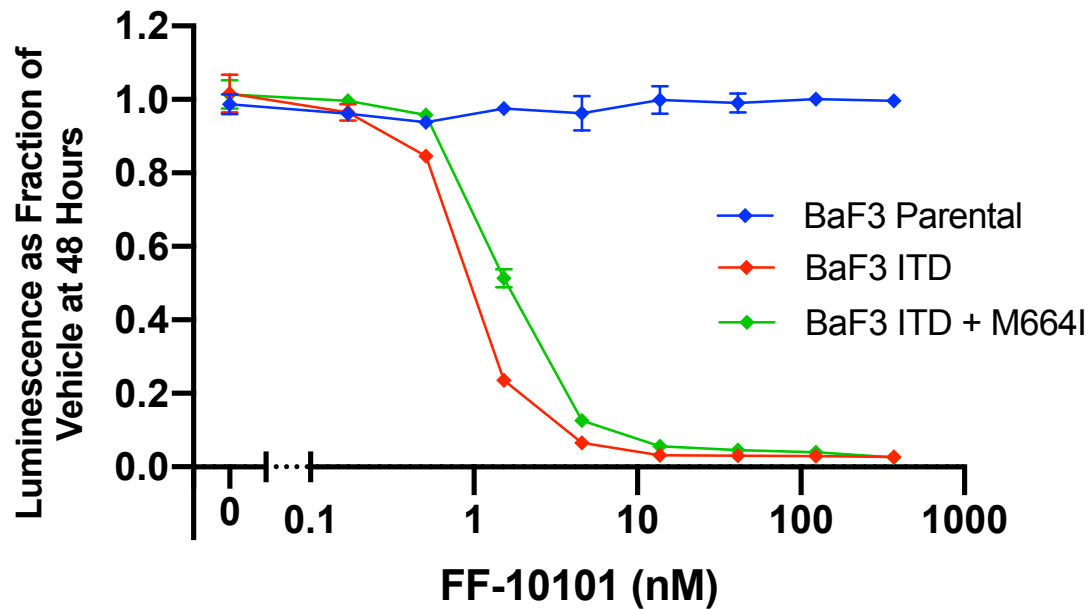

**Supplementary Figure 3. FLT3 M664I does not induce resistance to FF-10101.** 48-hour dose-response of FF-10101 against Ba/F3-ITD cells expressing *FLT3* M664I. Error bars represent standard deviation of three technical replicates in a single experiment representative of three independent experiments.

## Supplementary Figure 4

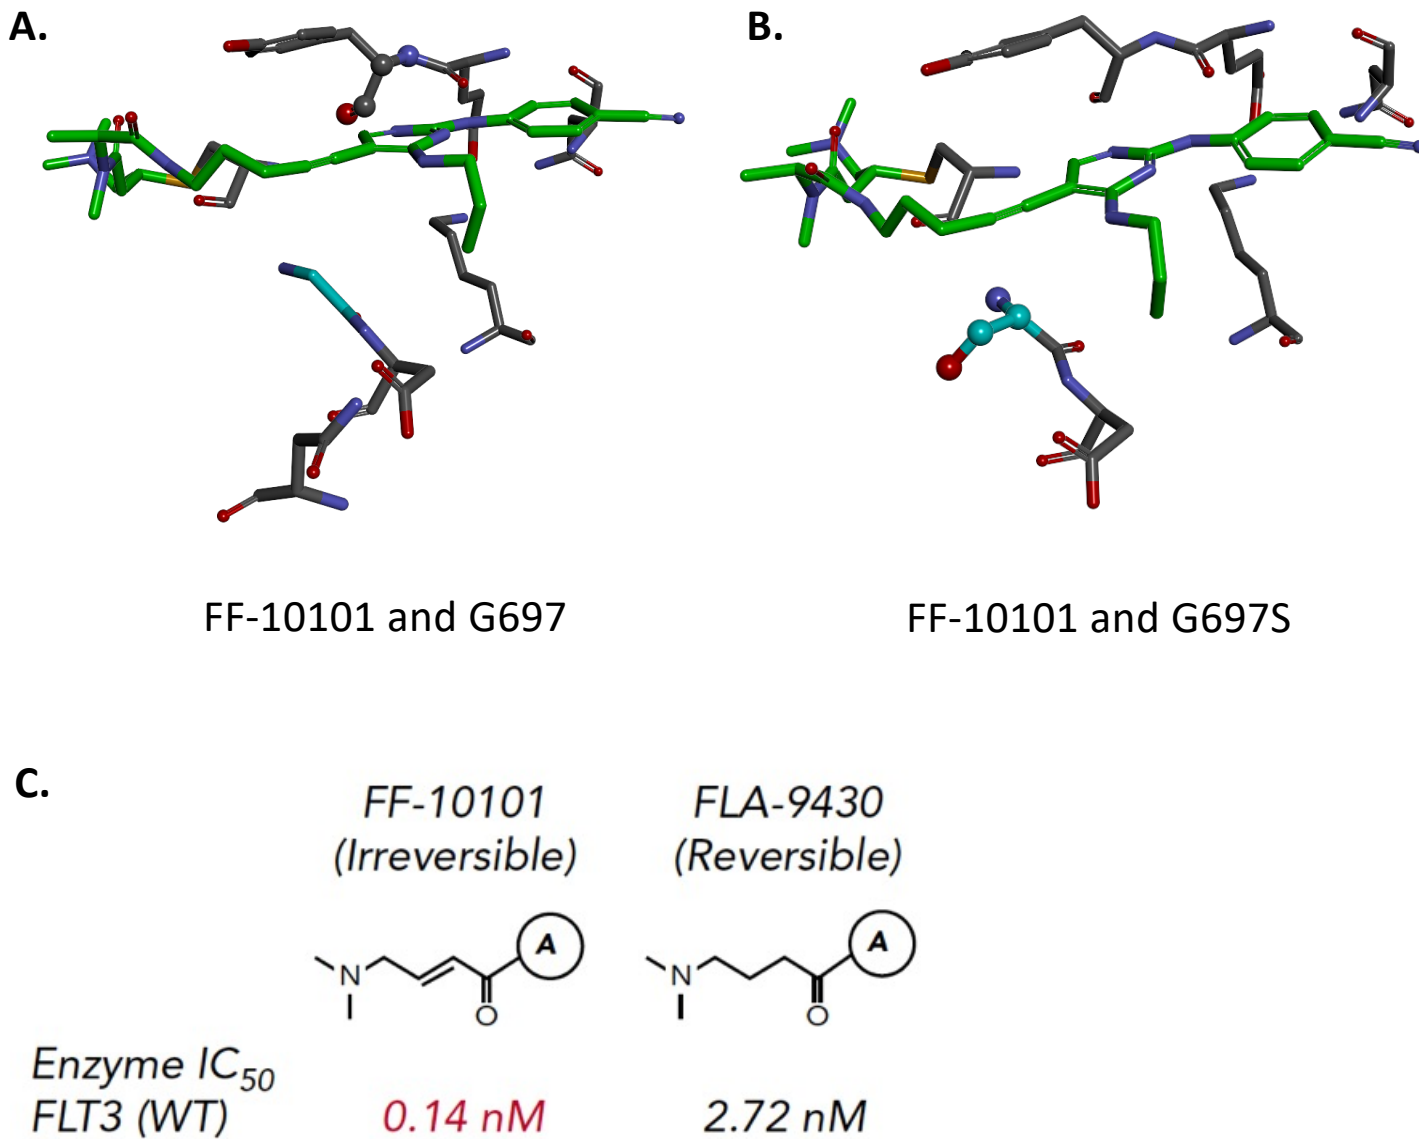

**Supplementary Figure 4. Structural modeling and chemical structures** (A) Structural model of FF-10101 against FLT3 G697 and (B) FLT3 G697S. (C) Chemical structures of FF-10101 and FLA-9430

## Supplementary Figure 5

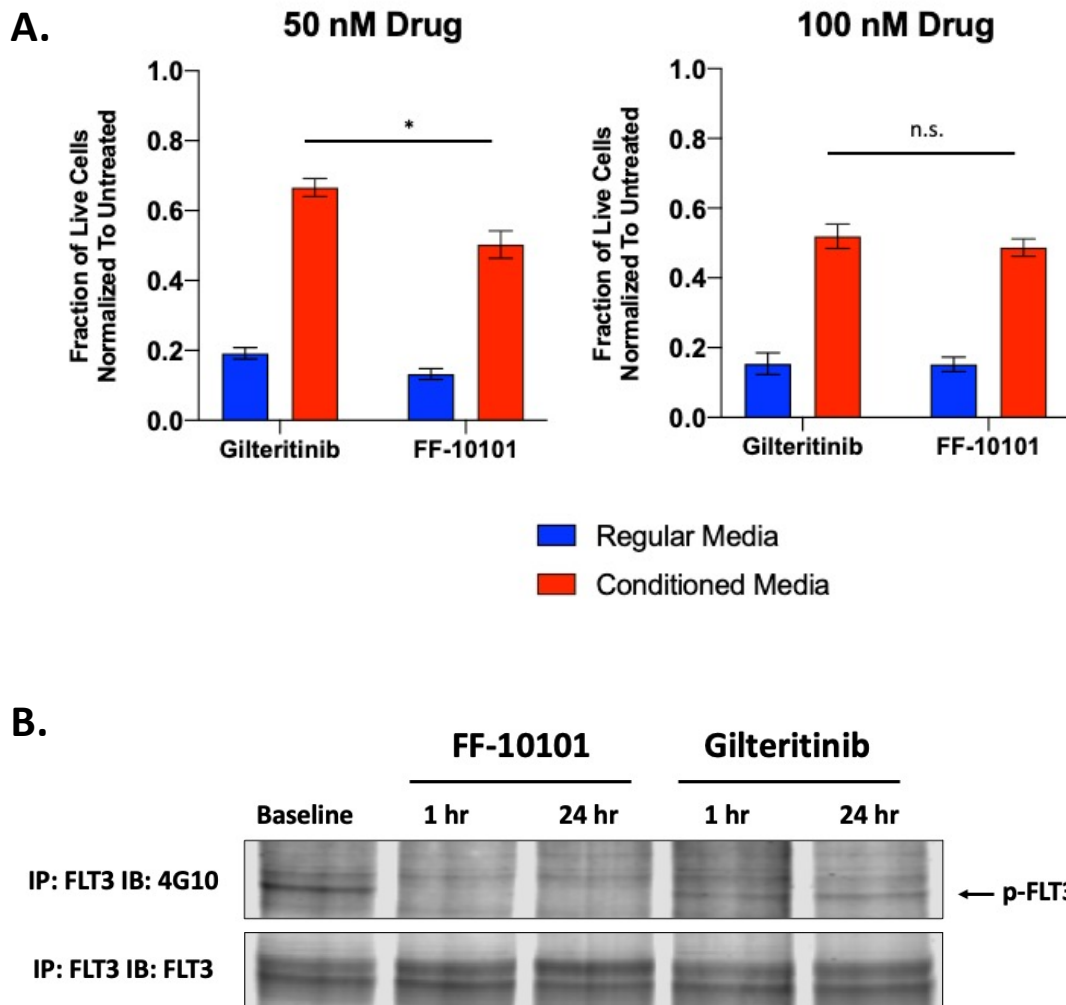

**Supplementary Figure 5. Comparing FF-10101 and gilteritinib in MV4-11 cells cultured in regular or HS5 conditioned media.** (A) Apoptosis measured in MV4-11 cells following 72-hour treatment with 50 nM (left) and 100 nM (right) gilteritinib or FF-10101 in regular complete RPMI media or HS5 conditioned media. Live cells negative for caspase-3 were normalized to untreated control cells. Results represent aggregate data from two independent experiments each with two technical replicates. Error bars represent SD and statistical analysis performed using paired t-test. \*,  $P=0.0189$ . (B) Assessment of FLT3 phosphorylation by immunoprecipitation and western blot in MOLM-14 cells treated with FF-10101 (50 nM) or gilteritinib (50 nM) for 1 and 24-hours in HS5 conditioned media.

# Supplementary Table 1

| Patient/Sample | Age/Gender | Mutations                                                                                                                                                                                                                    | Cytogenetics            |
|----------------|------------|------------------------------------------------------------------------------------------------------------------------------------------------------------------------------------------------------------------------------|-------------------------|
| AML #1         | 61/Male    | <ol style="list-style-type: none"> <li>1. FLT3-ITD (AR not reported)</li> <li>2. NPM1 W288fs (VAF 38.6%)</li> <li>3. DNMT3A A380E (VUS, VAF 45.8%)</li> </ol>                                                                | Normal Male Karyotype   |
| AML #2         | 69/Female  | <ol style="list-style-type: none"> <li>1. FLT3 D835V (VAF 91.2%)</li> <li>2. NPM1 W288fs (VAF 39.4%)</li> <li>3. WT1 S381fs (45.1%)</li> </ol>                                                                               | Normal Female Karyotype |
| AML #3         | 80/Female  | <ol style="list-style-type: none"> <li>1. FLT3-ITD (AR 0.79)</li> <li>2. DNMT3A F414Lfs*7 (VAF 44.9%)</li> <li>3. IDH1 R132C (VAF 44.6%)</li> <li>4. RUNX1 R320* (VAF 43.1%)</li> <li>5. DNMT3A R882H (VAF 43.9%)</li> </ol> | Normal Female Karyotype |
